# Supplementary material for: Exposure to microwave irradiation at constant culture temperature slows the growth ofEscherichia coliDE3 cells, leading to modified proteomic profiles
Source: Royal Society of Chemistry journal article supplement (doi:10.1039/c9ra00617f), 2019-01-01
Supplement: c9ra00617f1.pdf [file c9ra00617f1.pdf]

## Electronic Supporting Information

### **Exposure to microwave irradiation at constant culture temperature slows the growth of *Escherichia coli* DE3 cells, leading to modified metabolic profiles**

Sina Atrin Mazinani,<sup>a#</sup> Nour Noaman,<sup>b#</sup> Melissa Pergande,<sup>c</sup> Stephanie M. Cologna,<sup>c</sup> Jens  
Coorssen,<sup>b\*</sup> Hongbin Yan<sup>a\*</sup>

<sup>#</sup>These authors contributed equally to this work.

<sup>a</sup>Department of Chemistry and Centre for Biotechnology, Brock University, St. Catharines,  
Ontario, L2S 3A1, Canada

<sup>b</sup>Department of Applied Health Sciences and Department of Biological Sciences, Brock  
University, St. Catharines, Ontario, L2S 3A1, Canada

<sup>c</sup>Department of Chemistry, University of Illinois at Chicago, 845 W. Taylor St., Chicago, IL  
60607, USA

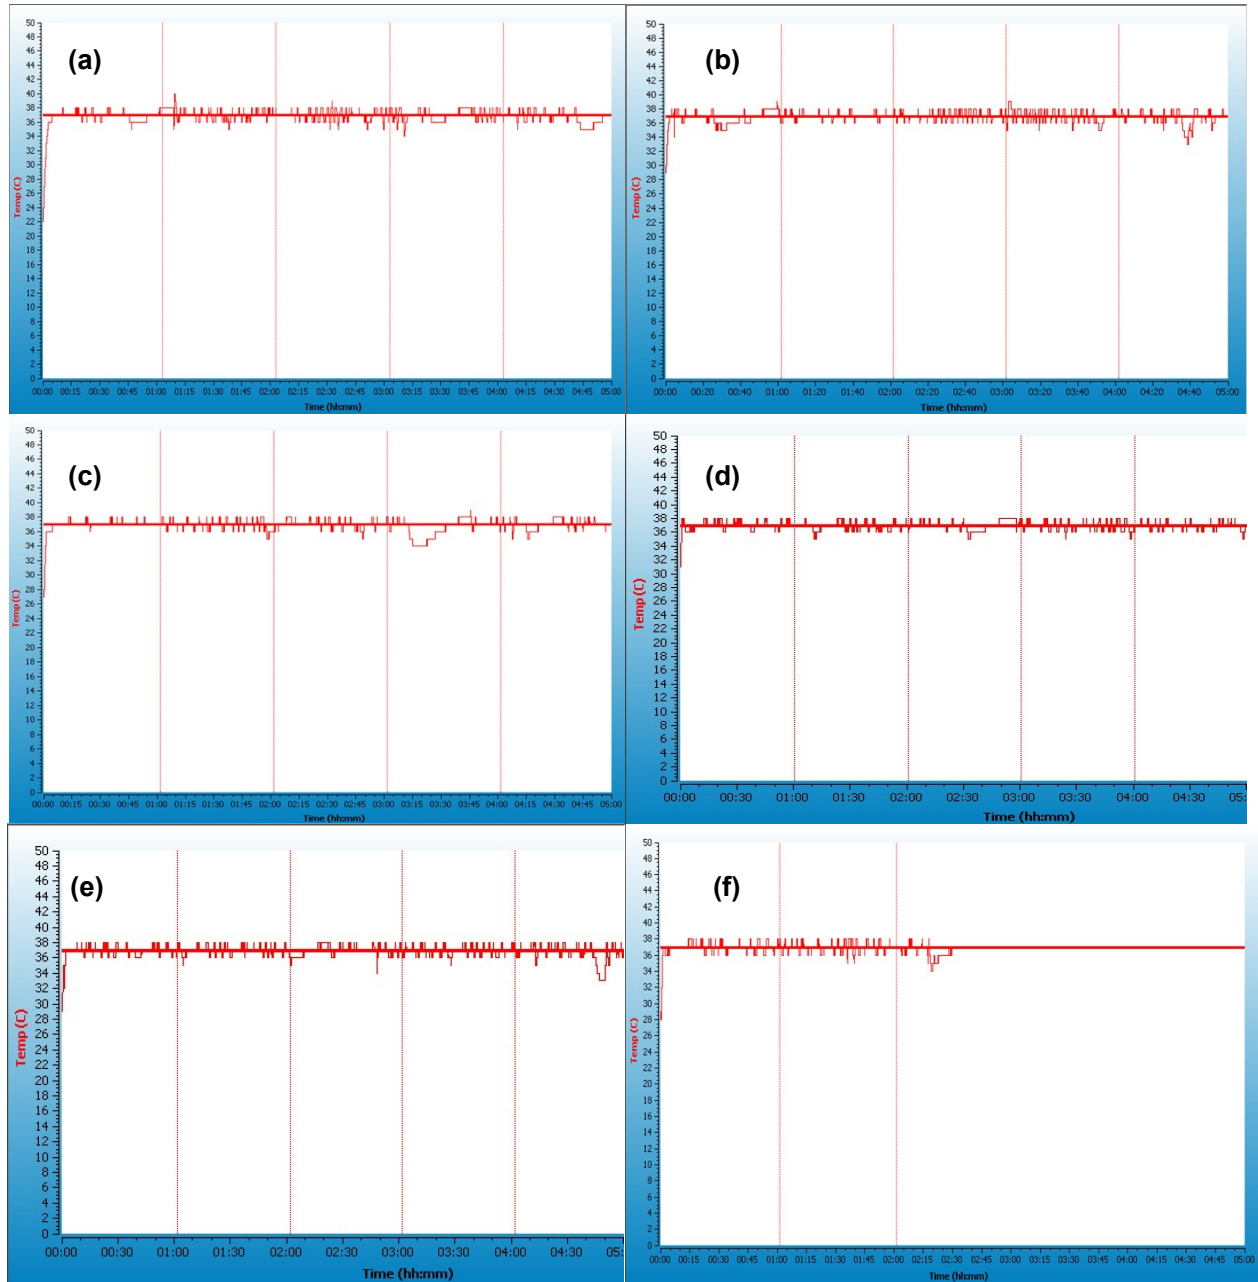

**Figure S1.** Temperature profiles of cultures throughout the growth period (total 27.5 hours). Note: as the Synergy software keeps track of temperature profiles on five-hour frames, multiple frames (a-f) were provided to cover the entire growth period.

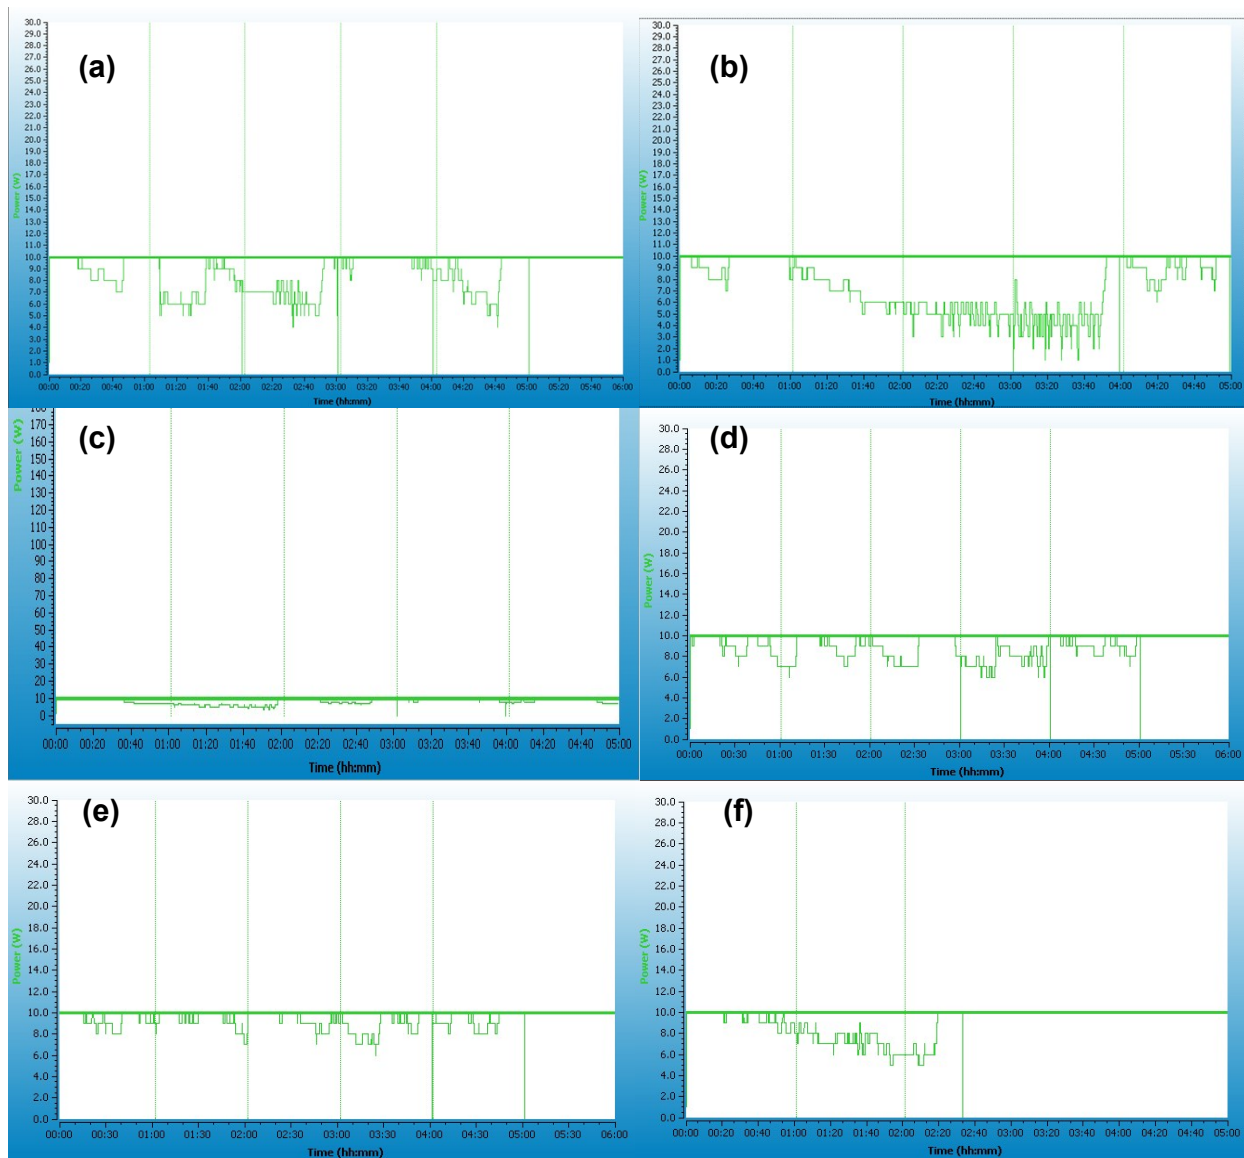

**Figure S2.** Profiles of microwave power output throughout the growth period (total 27.5 hours). Note: as the Synergy software only keeps track of power output profiles on five-hour frames, multiple frames (a-f) were provided to cover the entire growth period.

**Table 1S. DO levels in LB media.**

|                   | DO concentration (mg/L) average of two replicate experiments |                  |
|-------------------|--------------------------------------------------------------|------------------|
|                   | 1 hour                                                       | 2 hour           |
| Control           | 7.19 (7.23/7.15)                                             | 6.98 (6.94/7.01) |
| Microwave exposed | 6.50 (6.46/6.55)                                             | 6.40 (6.37/6.44) |

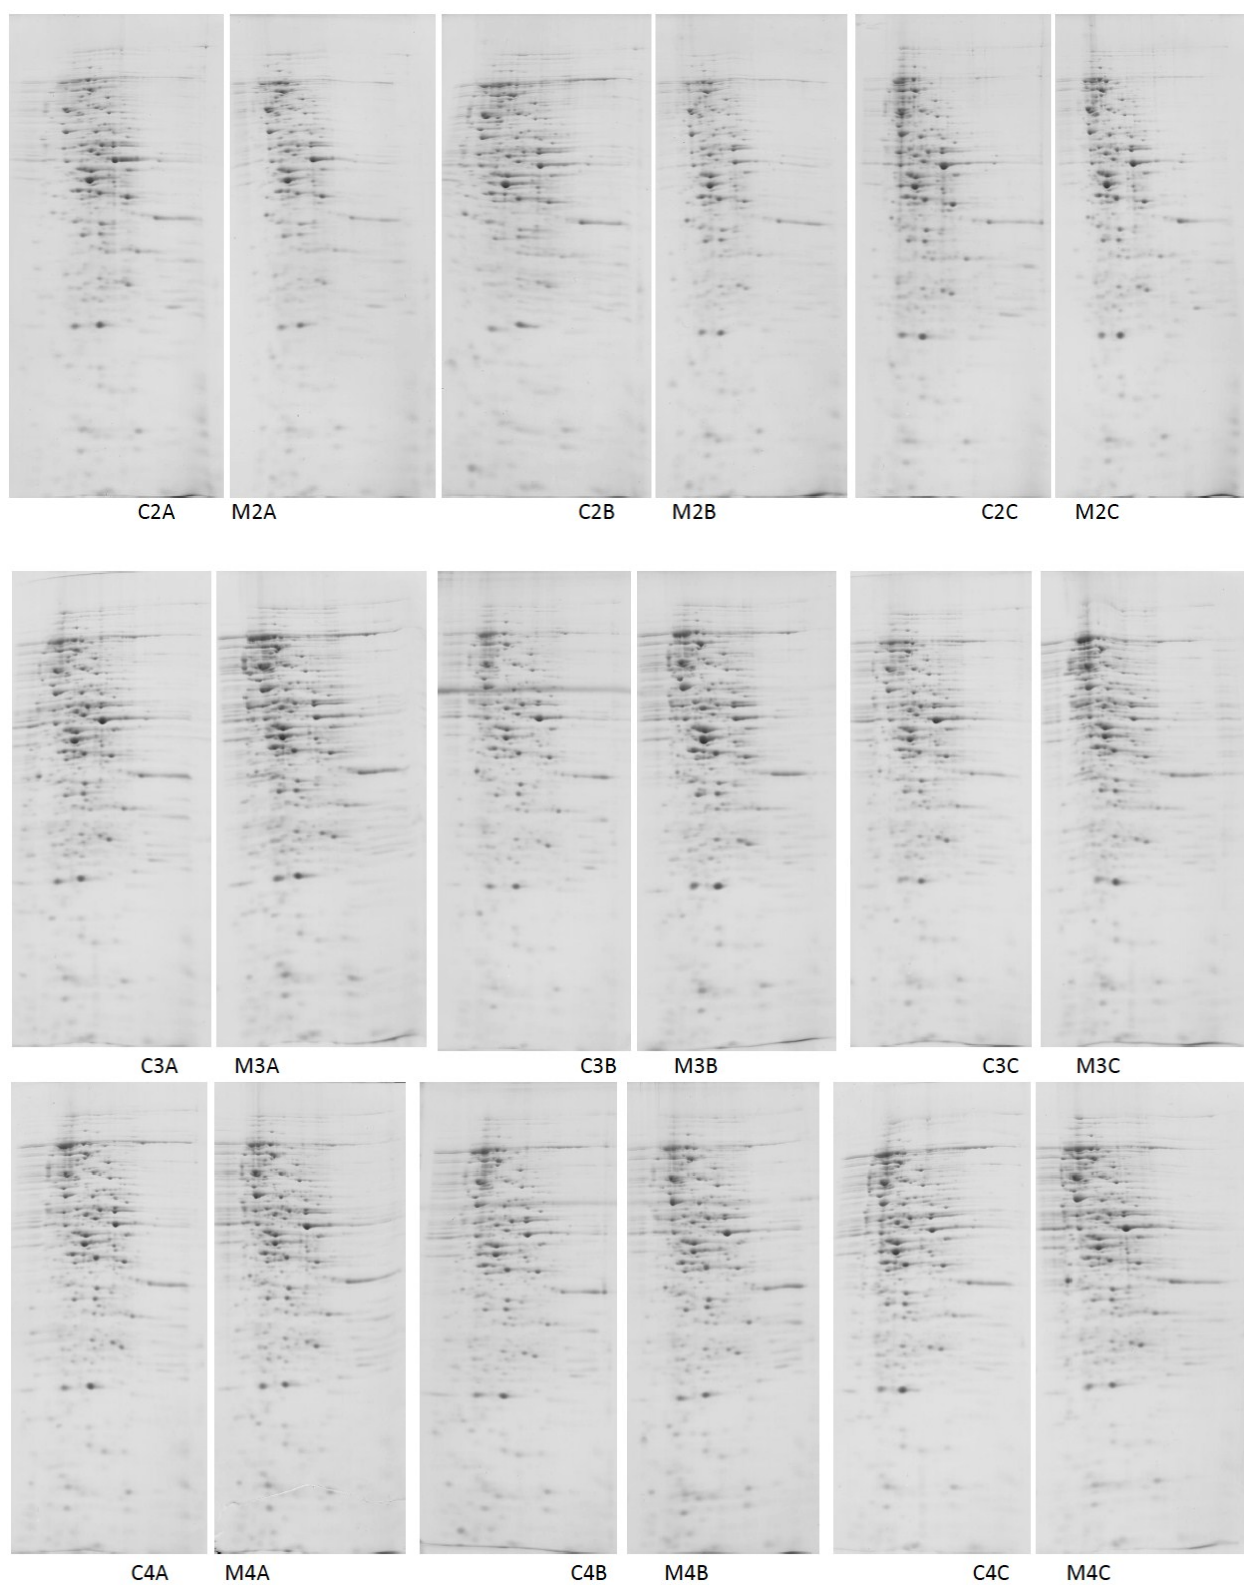

**Figure S3.** 2-D gel images of protein samples isolated from *E. coli* culture treated with microwave (M) and incubated in oil bath (Control).

C = control, M = microwave, 100  $\mu$ g total protein, 12.5% T mini-tall SDS-PAGE  
 Loading and IEF order: Run 1 (C2-ABC; M2-ABC); Run 2 (C3-ABC; C4-ABC; M3-ABC; M4-ABC). 2, 3 and 4 represent biological replicates; A, B and C are technical replicates. For SDS-PAGE, a single gel was shared between corresponding strips, i.e. C2A M2A were resolved together. C2 and M2 were resolved on gels cast in parallel; C3, C4, M3 and M4 were resolved on gels cast in parallel.

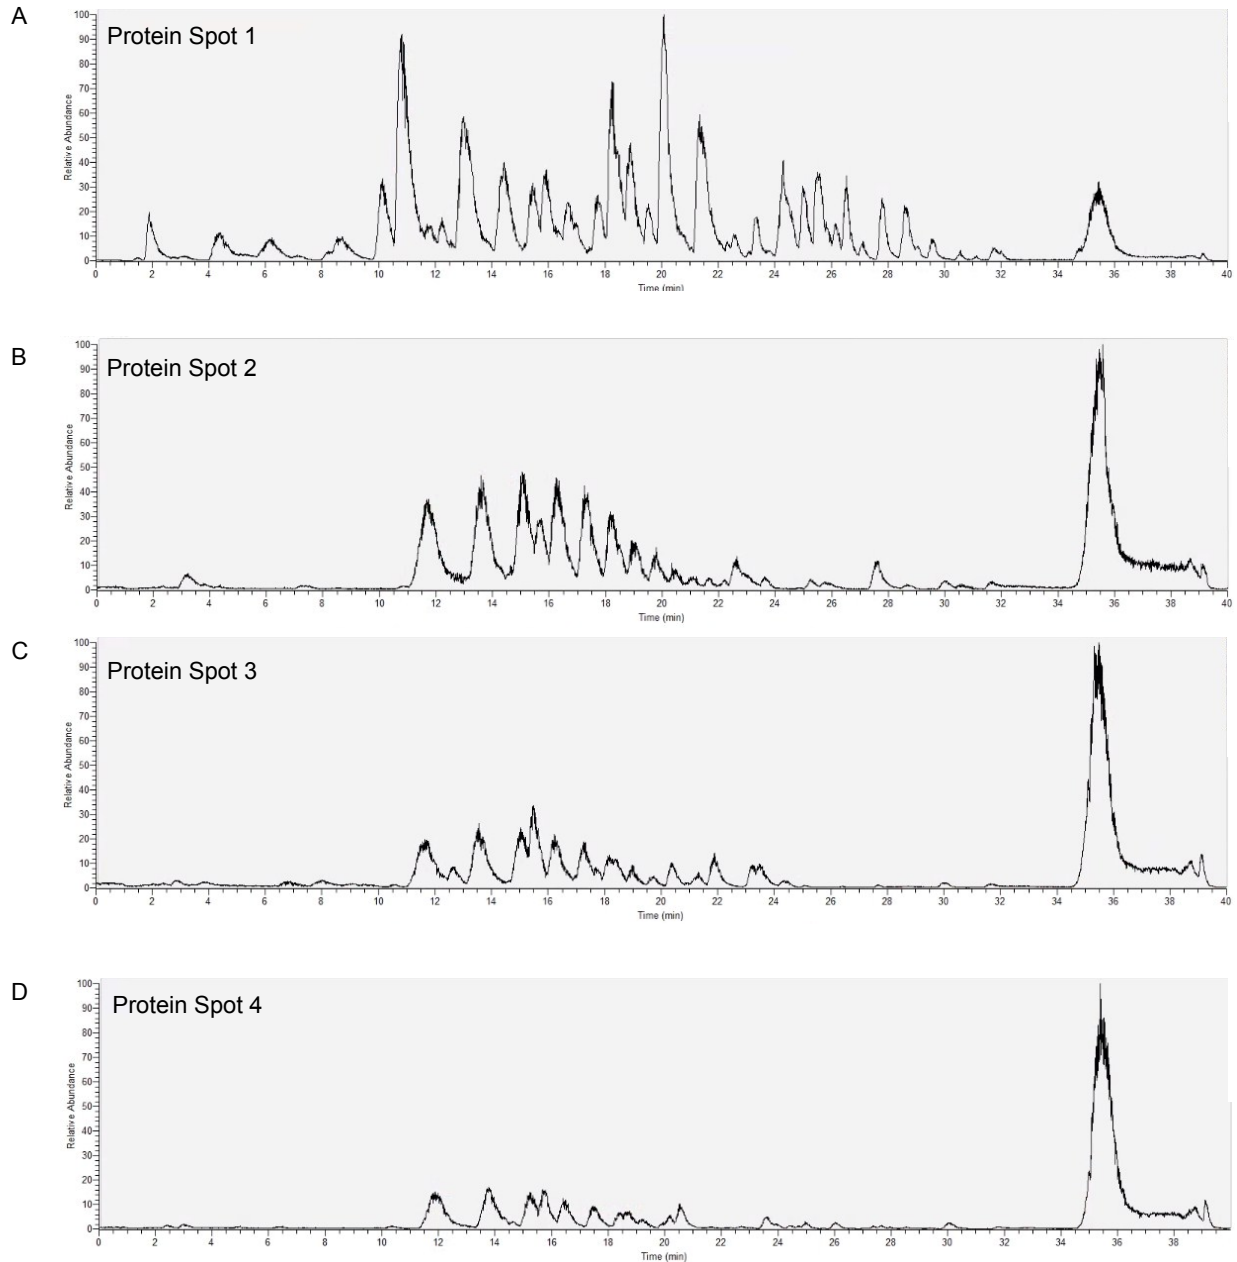

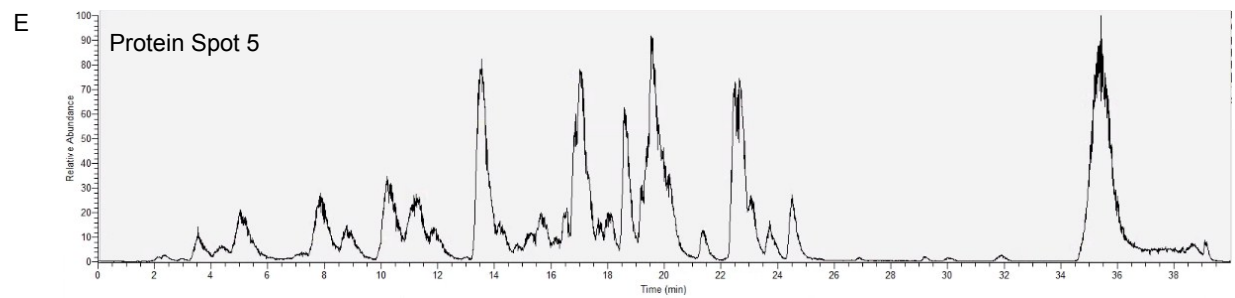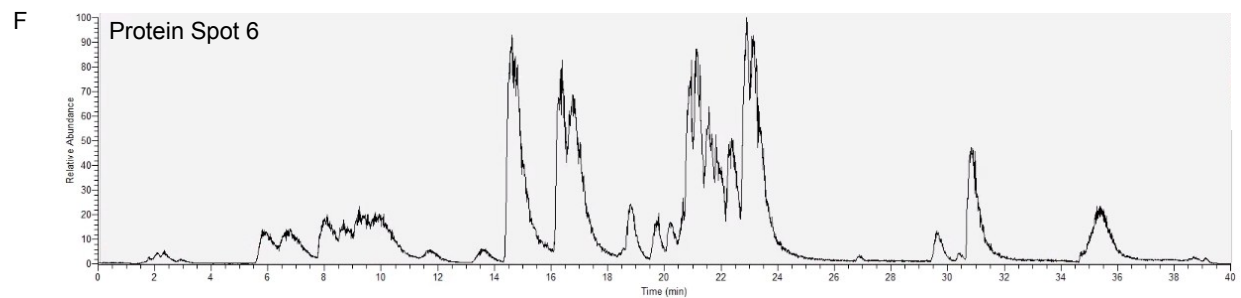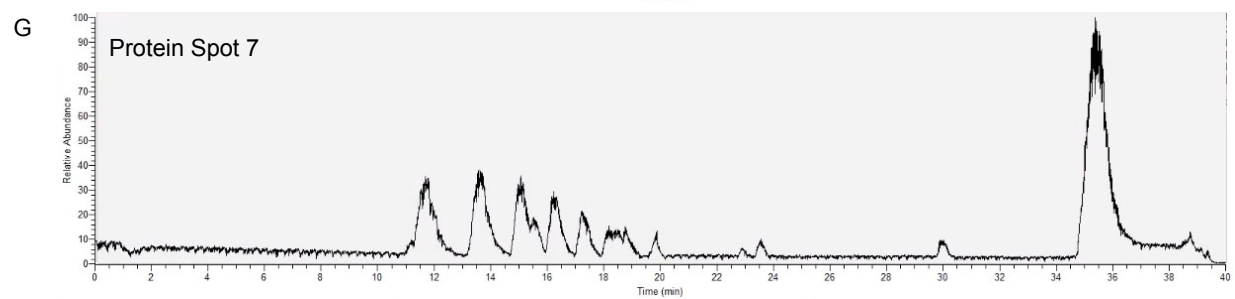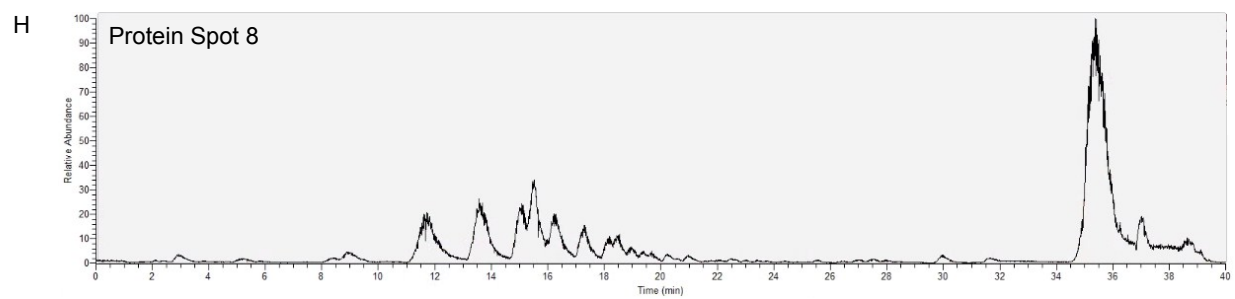

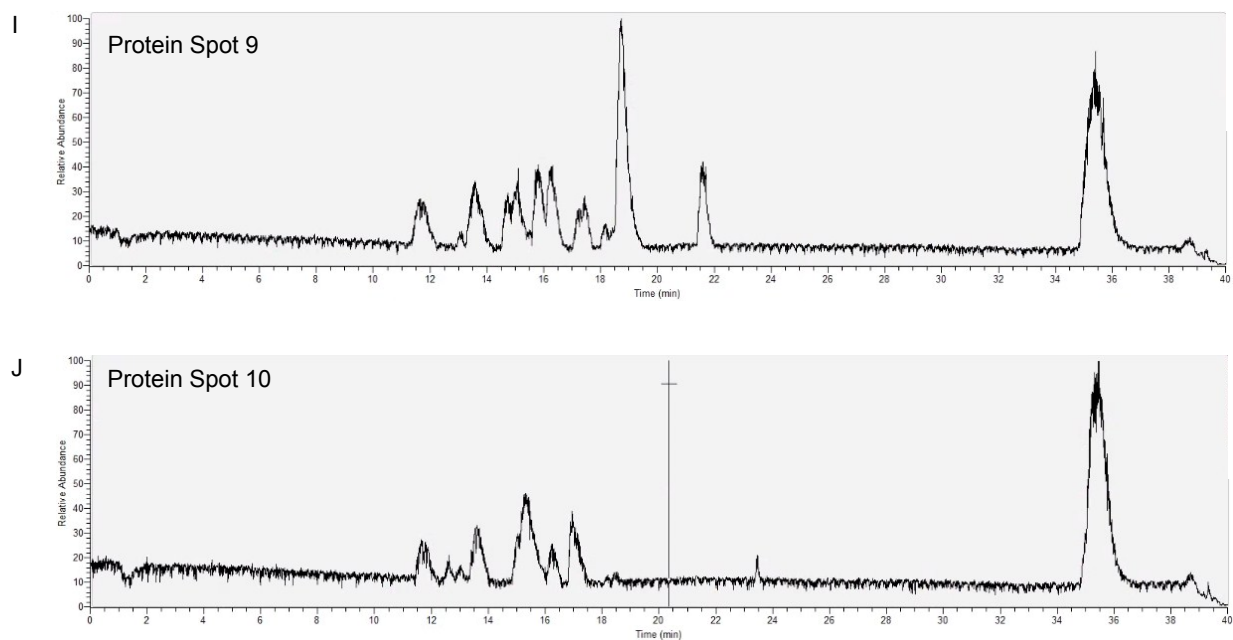

**Figure S4.** LC-MS chromatograms of the 10 resolved protein spots. Chromatographic separation of peptides was carried out using a Zorbax 300SB-C18 column (3.5  $\mu\text{m}$  i.d.  $\times$  150 mm, particle size 5  $\mu\text{m}$ , pore size 100 Å, Agilent Technologies, Wilmington, DE). Peptides were loaded onto a Zorbax 300SB-C18 trap cartridge at a flow rate of 2  $\mu\text{l}$  per minute for 10 min. After washing with 0.1% formic acid the peptides were eluted using a 5–40% B gradient for 30 min at a flow rate of 250 nl/min acid (mobile phase A = 0.1% formic acid; mobile phase B = 0.1% formic acid in acetonitrile) on an Agilent 1260 capillary/nano system.
